# Supplementary material for: A novel Mn2+ doped ScTaO4 dual-emitting phosphor for high temperature optical thermometry
Source: Royal Society of Chemistry journal article supplement (doi:10.1039/d4tc01284d), 2024-01-01
Supplement: d4tc01284d1.pdf [file d4tc01284d1.pdf]

## A novel Mn<sup>2+</sup> doped ScTaO<sub>4</sub> dual-emitting phosphor for high temperature optical thermometry

Jingshan Hou <sup>a,\*</sup>, Zhiyu Qin <sup>a</sup>, Jianghua Wu <sup>a</sup>, Tong Li <sup>a</sup>, Langping Dong <sup>a</sup>, Ganghua Zhang <sup>a</sup>, Guoying Zhao <sup>a</sup>, Yufeng Liu <sup>a</sup>, Haijie Chen <sup>b</sup> and Yongzheng Fang <sup>a,\*</sup>

<sup>a</sup> School of Materials Science and Engineering, Shanghai Institute of Technology, Shanghai, 201418, China.

<sup>b</sup> State Key Laboratory for Modification of Chemical Fibers and Polymer Materials, Institute of Functional Materials, College of Materials Science and Engineering, Donghua University, Shanghai, 201620, China.

Table S1. Crystallographic data, positions of all atoms and the occupancy for the STO:0.002Mn<sup>2+</sup> phosphor by Rietveld refinement.

| Cell parameters     | $a = 4.8060 \text{ \AA}$<br>$b = 5.6723 \text{ \AA}, c = 5.1152 \text{ \AA}$<br>$\alpha = \gamma = 90^\circ, \beta = 91.6^\circ$<br>$V = 139.39 \text{ \AA}^3$ |          |          |                    |                    |
|---------------------|----------------------------------------------------------------------------------------------------------------------------------------------------------------|----------|----------|--------------------|--------------------|
| Space group         | $P12/c1$ , monoclinic                                                                                                                                          |          |          |                    |                    |
| Reliability factors | $R_{wp} = 5.95 \%$ $R_p = 4.5 \%$ $\chi^2 = 4.293$                                                                                                             |          |          |                    |                    |
| Atoms               | $x$                                                                                                                                                            | $y$      | $z$      | $B_{iso}/B_{eq}^a$ | s.o.f <sup>b</sup> |
| Sc1                 | 0.5                                                                                                                                                            | 0.653    | 0.25     | 0.01442            | 0.998              |
| Sc2                 | -0.5                                                                                                                                                           | -0.653   | -0.25    | 0.01442            | 0.998              |
| Mn1                 | 0.5                                                                                                                                                            | 0.653    | 0.25     | 0.01442            | 0.002              |
| Mn2                 | -0.5                                                                                                                                                           | -0.653   | -0.25    | 0.01442            | 0.002              |
| Ta1                 | 0                                                                                                                                                              | 0.18192  | 0.25     | 0.00554            | 1                  |
| Ta2                 | 0                                                                                                                                                              | -0.18192 | -0.25    | 0.00554            | 1                  |
| O1                  | 0.245969                                                                                                                                                       | 0.173898 | -0.08142 | 0.03694            | 1                  |

|    |          |          |          |         |   |
|----|----------|----------|----------|---------|---|
| O2 | 0.428979 | -0.30484 | 0.43935  | 0.02188 | 1 |
| O3 | -0.24597 | -0.1739  | 0.081417 | 0.02598 | 1 |
| O4 | -0.22643 | 0.083607 | -0.41481 | 0.02633 | 1 |
| O5 | 0.217765 | 0.451892 | 0.402127 | 0.02133 | 1 |

<sup>a</sup> $B_{iso}/B_{eq}$  refers to the general temperature factor. <sup>b</sup>s.o.f refers to the site occupation fraction.

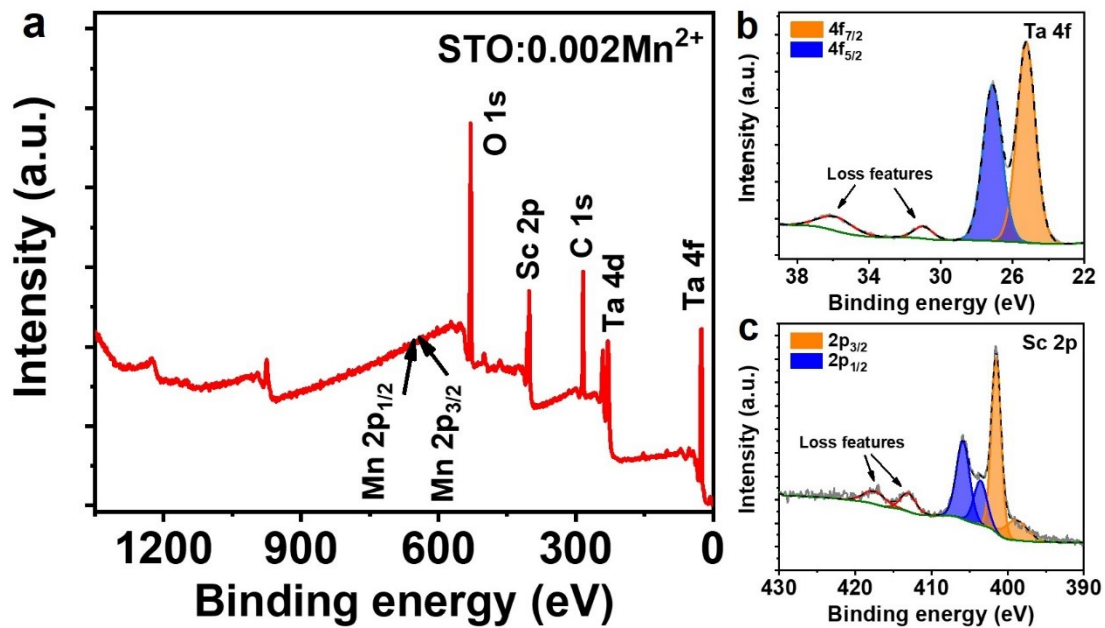

Fig. S1 (a) XPS survey spectra of  $\text{STO:0.002Mn}^{2+}$ , (b) HR-XPS core spectra of Ta 4f orbital and (c) HR-XPS core spectra of Sc 2p orbital.

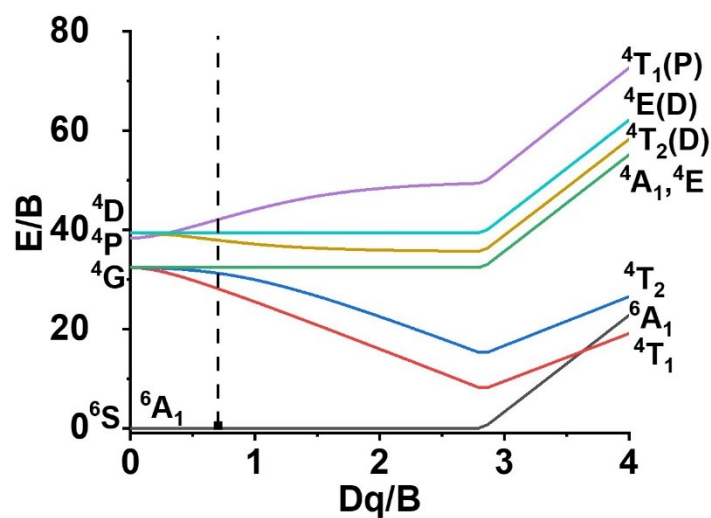

Fig. S2 Tanabe–Sugano diagram of  $3d^5$  electronic configuration of  $\text{Mn}^{2+}$  ions.

Details calculation for the Dq and Dq/B for the  $\text{STO:0.002Mn}^{2+}$ : Four excitation bands

around at  $27324.04\text{cm}^{-1}$ (366nm),  $23530.82\text{cm}^{-1}$ (425nm),  $22473.26\text{cm}^{-1}$ (445nm), and  $21098.31\text{cm}^{-1}$ (474nm) are corresponding to the transitions of  ${}^6\text{A}_1({}^6\text{S}) \rightarrow {}^4\text{E}({}^4\text{D})$ ,  ${}^6\text{A}_1({}^6\text{S}) \rightarrow {}^4\text{T}_2({}^4\text{D})$ ,  ${}^6\text{A}_1({}^6\text{S}) \rightarrow {}^4\text{E}$ ,  ${}^4\text{A}_1({}^4\text{G})$ , and  ${}^6\text{A}_1({}^6\text{S}) \rightarrow {}^4\text{T}_2({}^4\text{G})$  of  $\text{Mn}^{2+}$  ions by utilizing the Tanabe–Sugano energy level diagram for the  $3\text{d}^5$  configuration of  $\text{Mn}^{2+}$ . The transitions of  ${}^4\text{E}({}^4\text{D}) \rightarrow {}^6\text{A}_1({}^6\text{S})$  and  ${}^4\text{E}$ ,  ${}^4\text{A}_1({}^4\text{G}) \rightarrow {}^6\text{A}_1({}^6\text{S})$  are parity- and spin-forbidden. The ground state  ${}^6\text{S}$  level is set to zero, the coordination of  ${}^4\text{G}$  and  ${}^4\text{D}$  energies of octahedron  $\text{Mn}^{2+}$  depends on the Racah parameter values of  $B$  and  $C$ , which can be calculated follow the equations:

$${}^6\text{A}_1({}^6\text{S}) \rightarrow {}^4\text{E}, {}^4\text{A}_1({}^4\text{G}) = 10B + 5C \text{ (S1)}$$

$${}^6\text{A}_1({}^6\text{S}) \rightarrow {}^4\text{E}, ({}^4\text{D}) = 17B + 5C \text{ (S1)}$$

$$E {}^4\text{E}, {}^4\text{A}_1({}^4\text{G}) + E {}^4\text{E}, ({}^4\text{D}) = 10Dq \text{ (S3)}$$

where  $B$  and  $C$  are Racah parameters,  $Dq$  is the cubic-field splitting parameter. The  $Dq = 485 \text{ cm}^{-1}$ ,  $B = 693$ ,  $C = 3109$ ,  $Dq/B = 0.7$ .

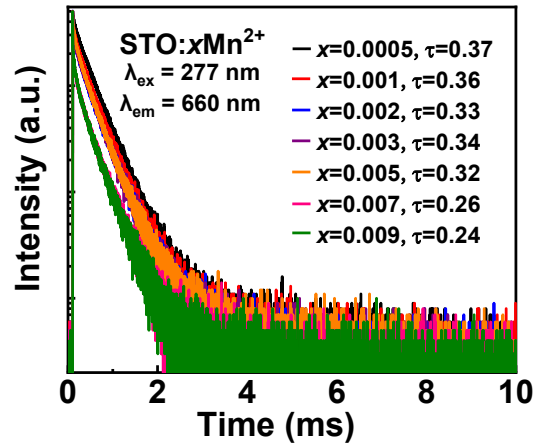

Fig. S3 Decay curves of  $\text{STO}:x\text{Mn}^{2+}$  phosphors by monitoring the emission at 660

nm

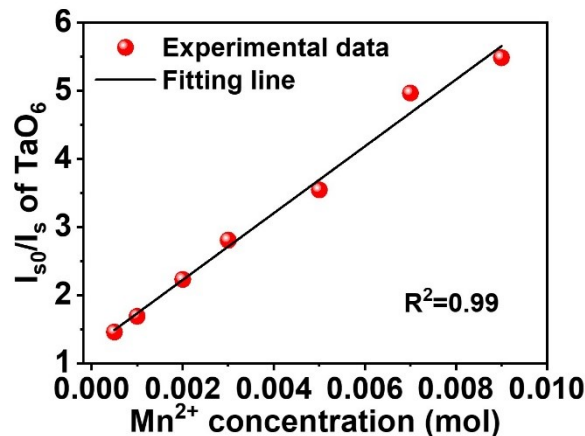

Fig. S4 Relationship between the intensity ratio  $I_{s0}/I_s$  of  $[\text{TaO}_6]$  groups and  $\text{Mn}^{2+}$  doping concentrations

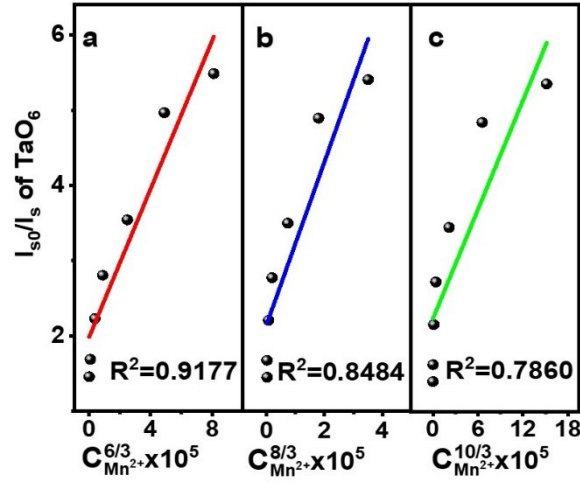

Fig. S5 Dependence of  $I_{s0}/I_s$  of host on  $C_{\text{Mn}^{2+}}^{6/3}$  (a),  $C_{\text{Mn}^{2+}}^{8/3}$  (b), and  $C_{\text{Mn}^{2+}}^{10/3}$  (c).

Details for the energy transfer process: The relationship between the intensity ratio  $I_{s0}/I_s$  of  $[\text{TaO}_6]$  groups and  $\text{Mn}^{2+}$  doping concentrations are shown in Fig. S4. Where  $I_s$  and  $I_{s0}$  represent the emission intensity of  $[\text{TaO}_6]$  groups with and without  $\text{Mn}^{2+}$  ions, respectively. As the doping  $\text{Mn}^{2+}$  ion concentration increase, the value of  $I_{s0}/I_s$  for  $\text{TaO}_6$  groups monotonically increases, which further suggests that there's an effective energy transfer path existing between  $[\text{TaO}_6]$  groups and  $\text{Mn}^{2+}$  ions. The energy transfer process from  $[\text{TaO}_6]$  groups to  $\text{Mn}^{2+}$  in  $\text{STO}:\text{Mn}^{2+}$  in  $\text{STO}$  should occurs via a multipolar interaction according to the Dexter's energy transfer expression and Reisfeld's approximation. The following relation can be given: S1,S2

$$\eta_0/\eta \propto C^{\alpha/3} \quad (\text{S4})$$

where  $\eta_0$  and  $\eta$  represent emission quantum efficiencies of the host without and with  $\text{Mn}^{2+}$  ions, respectively;  $C$  is the concentration of  $\text{Mn}^{2+}$ ; and the  $\alpha = 6, 8, 10$  corresponding to dipole-dipole, dipole-quadrupole and quadrupole-quadrupole

interaction, respectively. The value of  $\eta_0/\eta$  can be approximately estimated by the emission intensity ratio ( $I_{s0}/I_s$ ) as follow: S1,S2

$$I_{s0}/I_s \propto C^{\alpha/3} \quad (S5)$$

The dependence of  $I_{s0}/I_s$  for  $C_{Mn^{2+}}^{\alpha/3}$  ( $\alpha = 6, 8, 10$  respectively) are exhibited in Fig. S5. The linear fitting is found to give a best match when  $\alpha = 6$ , with a correlation coefficient  $R^2=0.9177$ . Indicating that the dominant energy transfer mechanism from  $[TaO_6]$  groups to  $Mn^{2+}$  in STO is a dipole-dipole interaction.

Table S2 The CIE coordinates of STO: $xMn^{2+}$  ( $x = 0 \sim 0.009$ ) samples

| Mn <sup>2+</sup> concentration | CIE coordinate (x, y) |
|--------------------------------|-----------------------|
| 0.000                          | (0.222, 0.302)        |
| 0.0005                         | (0.374, 0.329)        |
| 0.001                          | (0.418, 0.306)        |
| 0.002                          | (0.475, 0.307)        |
| 0.003                          | (0.502, 0.305)        |
| 0.005                          | (0.516, 0.303)        |
| 0.007                          | (0.538, 0.303)        |
| 0.009                          | (0.543, 0.305)        |

Table S3 CIE chromaticity coordinates of STO:0.0005Mn<sup>2+</sup> sample at various temperatures

| Temperature (K) | CIE coordinate (x, y) |
|-----------------|-----------------------|
| 298             | (0.374, 0.329)        |
| 323             | (0.367, 0.332)        |
| 348             | (0.343, 0.331)        |
| 373             | (0.330, 0.330)        |
| 398             | (0.318, 0.329)        |
| 423             | (0.310, 0.327)        |
| 448             | (0.295, 0.325)        |
| 473             | (0.279, 0.322)        |

The temperature uncertainty  $\delta T$  (thermal resolution) could be calculated follow the equation:

$$\delta T = \frac{1}{S_r} \frac{\delta LIR}{LIR} \quad (S6)$$

where  $\delta LIR$  is the uncertainty in LIR, considering the uncertainty in the measurement

of the influence intensity,  $\frac{\delta LIR}{LIR}$  can be calculated according to the equation:

$$\frac{\delta LIR}{LIR} = \sqrt{\left(\frac{\delta I_{host}}{I_{host}}\right)^2 + \left(\frac{\delta I_{Mn^{2+}}}{I_{Mn^{2+}}}\right)^2} \quad (S7)$$

For each transition, we can assume that:

$$\frac{\delta I_{host}}{I_{host}} = \frac{\delta I_{bl}}{\langle I \rangle} \quad (S8)$$

Where  $\delta I_{bl}$  is the uncertainty determined by the fluctuations of the baseline readout, and  $\langle I \rangle$  denotes the average intensity and evaluated over whole emission spectral region ( $E_0 \leq E \leq E_1$ ) by the equation:

$$\langle I \rangle = \frac{\int_{E_0}^{E_1} I(E) dE}{E_1 - E_0} \quad (S9)$$

Combine above equation (S6-S9), the temperature  $\delta T$  could be calculated.

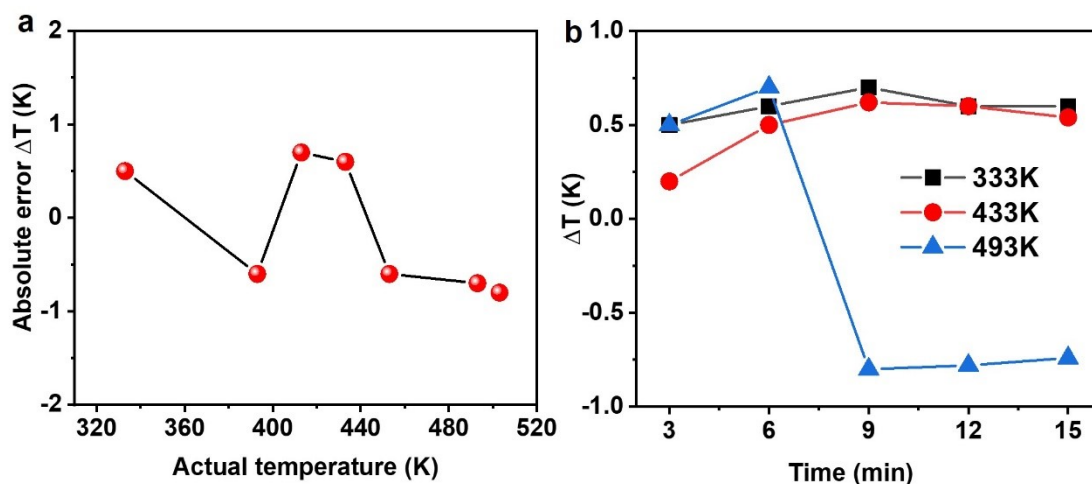

Fig. S6 (a) Absolute error at different temperature and (b) the repeatability of the optical fiber thermometry prototype.

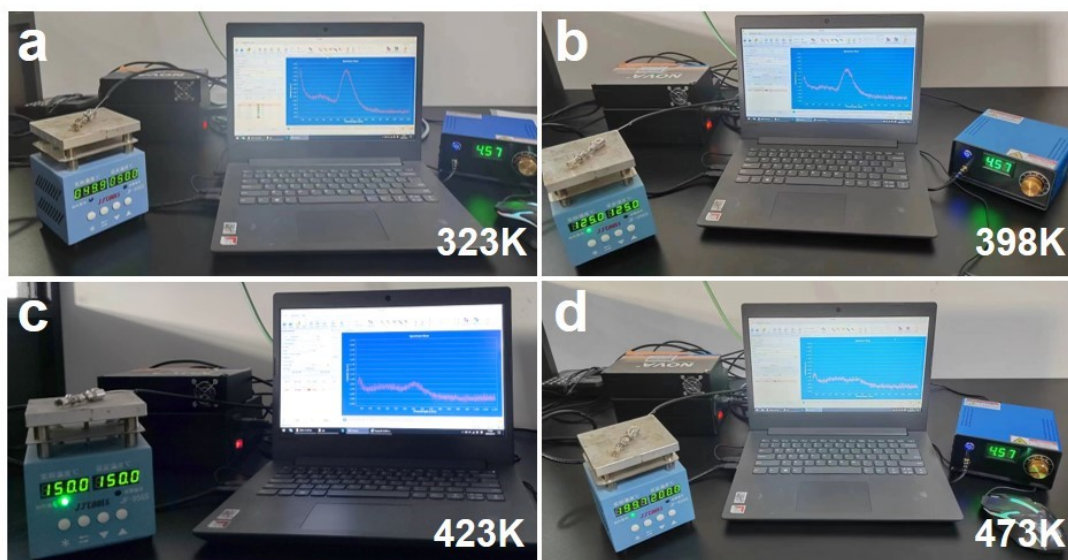

Fig. S7 The actual application using a heating stage and measuring the temperature with the prototype at 323 K (a), 398 K (b), 423 K (c) and 473 K (d).

#### References

- 1 D. L. Dexter and J. H. Schulman, *J. Chem. Phys.*, 1954, 22, 6: 1063-1070.
- 2 Blasse, *G. Phys. Lett. A* 1968, 28, 444-445.
